# Supplementary material for: Pyrene–antipyrine based highly selective and sensitive turn-on fluorescent sensor for Th(iv)
Source: Royal Society of Chemistry journal article supplement (doi:10.1039/c7nj01907f), 2017-01-01
Supplement: c7nj01907f1.pdf [file c7nj01907f1.pdf]

## Electronic Supporting Information (ESI)

### **Pyrene-antipyrene based highly selective and sensitive turn-on fluorescent sensor for Th(IV)**

**B. Kirthika Rani<sup>#</sup> and S. Abraham John<sup>\*</sup>**

Centre for Nanoscience and Nanotechnology  
Department of Chemistry, Gandhigram Rural Institute  
Gandhigram-624 302, Dindigul, Tamilnadu, India

<sup>#</sup>Department of Chemistry, The American College, Madurai-625 002, India

#### **New Journal of Chemistry**

#### **I. Procedure for the determination of quantum yield**

The fluorescence quantum yield was determined using anthracene as a reference with a known  $\phi_R$  of 0.27 in ethanol. The probe and the reference were excited at the same wavelength, with nearly equal absorbance and the emission spectra were recorded. The quantum yield is calculated according to the following equation:

$$\phi_S/\phi_R = [A_S/A_R] \times [(Abs)_R/(Abs)_S] \times [\eta_S^2/\eta_R^2]$$

Where,  $\phi_S$  and  $\phi_R$  are the fluorescence quantum yields of the sample and reference, respectively.  $A_S$  and  $A_R$  are the area under the emission spectra of the sample and reference respectively,  $(Abs)_S$  and  $(Abs)_R$  are the respective optical densities of the sample and the reference solution at the wavelength of excitation and  $\eta_S$  and  $\eta_R$  are the values of refractive index for the respective solvent used for the sample and reference.

## II. Figures

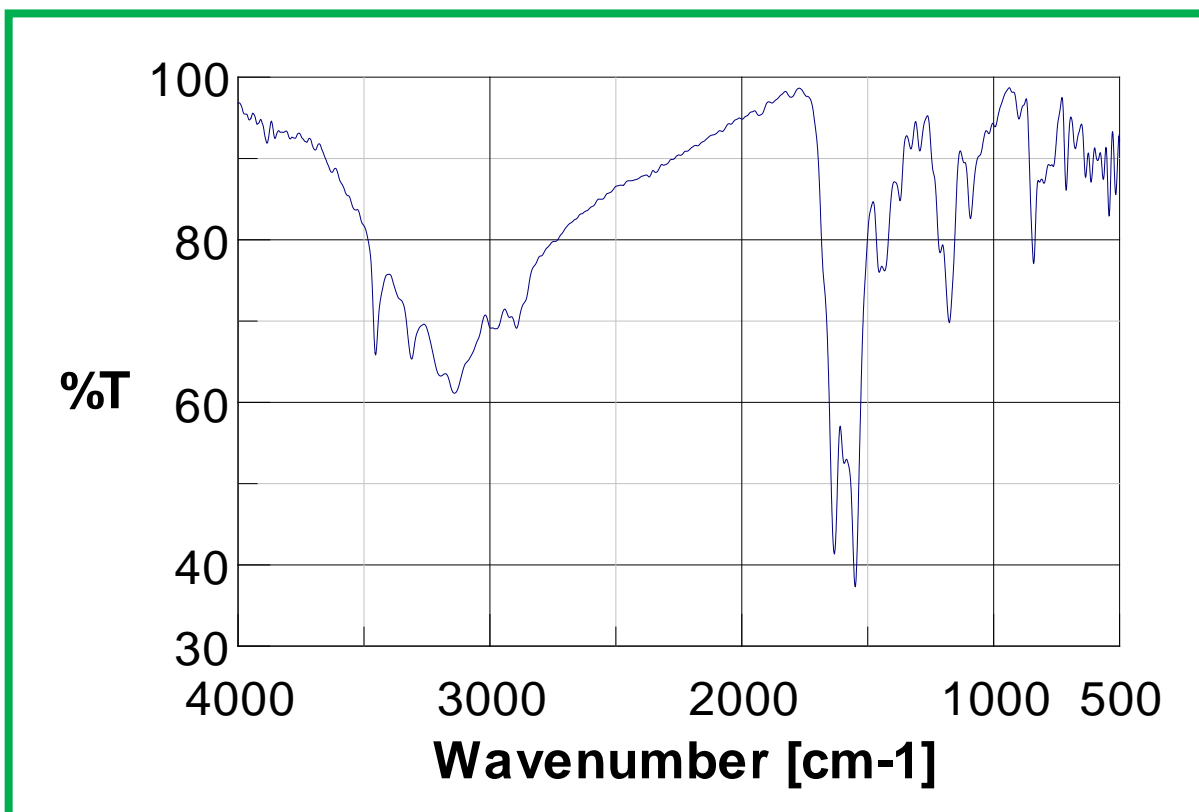

**Fig. S1** FT-IR spectrum of the Probe PYAN.

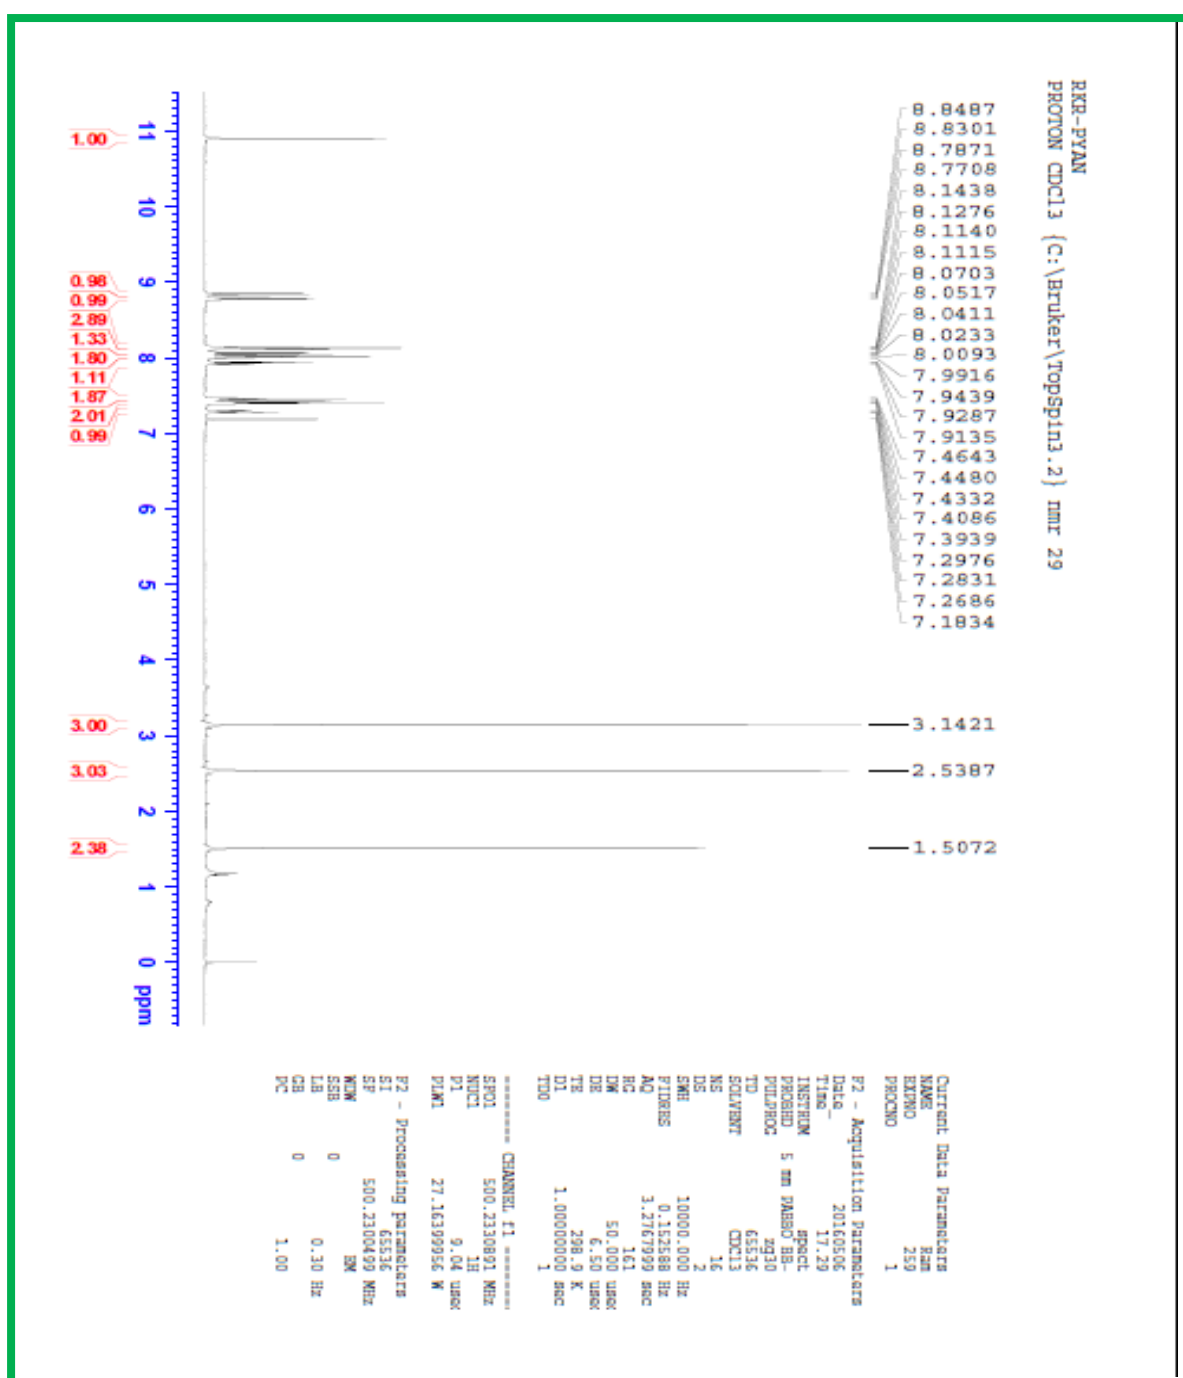

Fig. S2 <sup>1</sup>H NMR spectrum of the Probe PYAN.

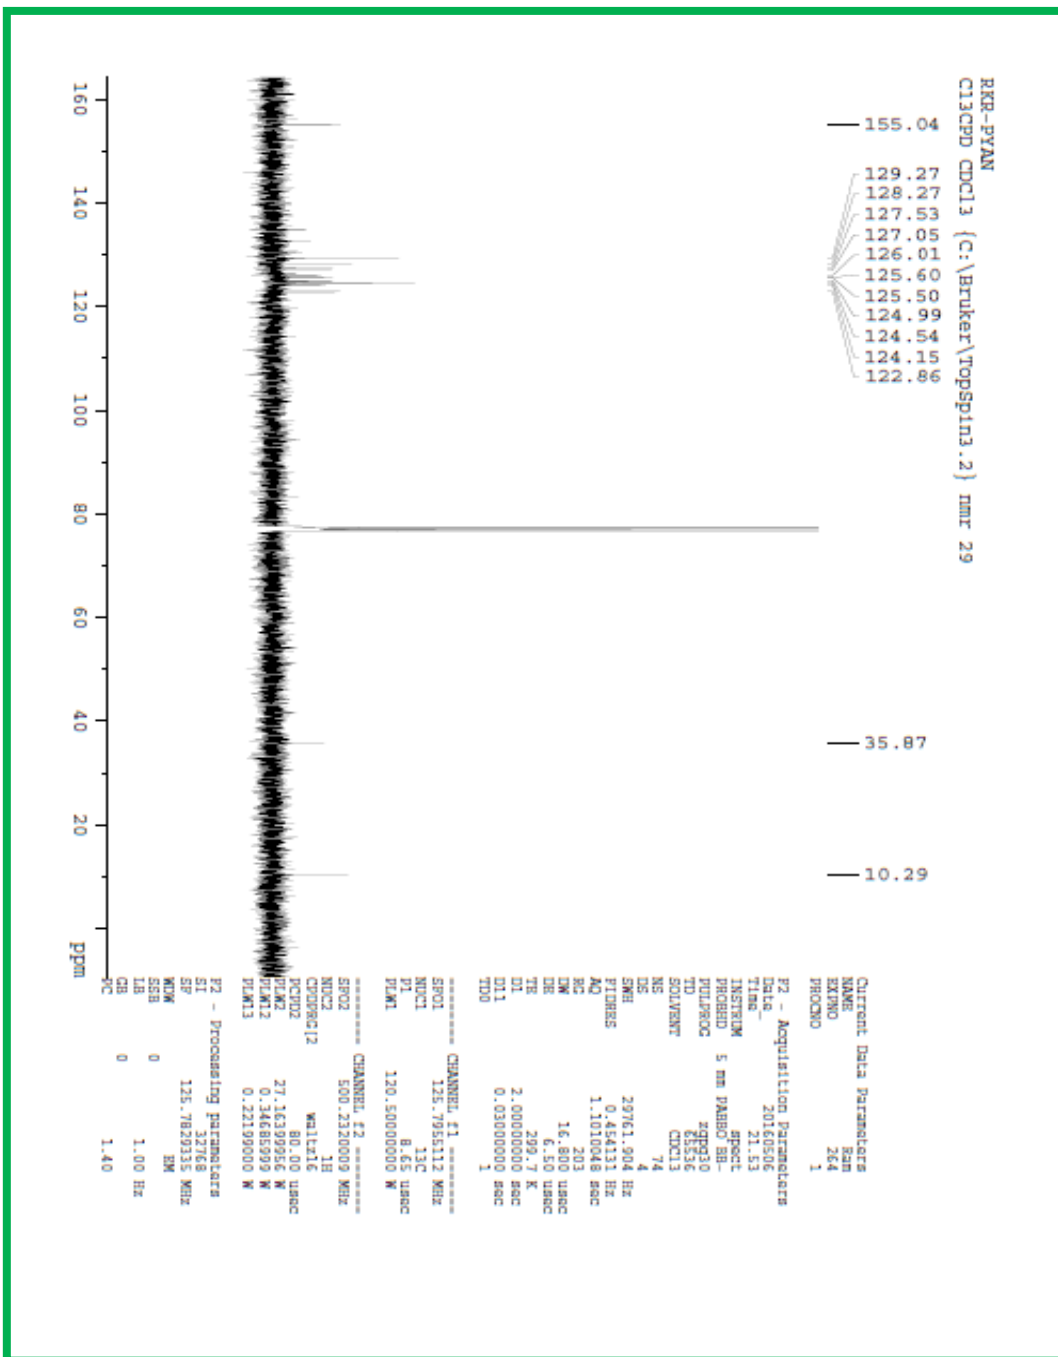

Fig. S3 <sup>13</sup>C NMR spectrum of the Probe PYAN.

D:\GCMS DATA\DATA\AAV\RAMKUMAR\YEAR2016\JUN2016\PYAN.qgd

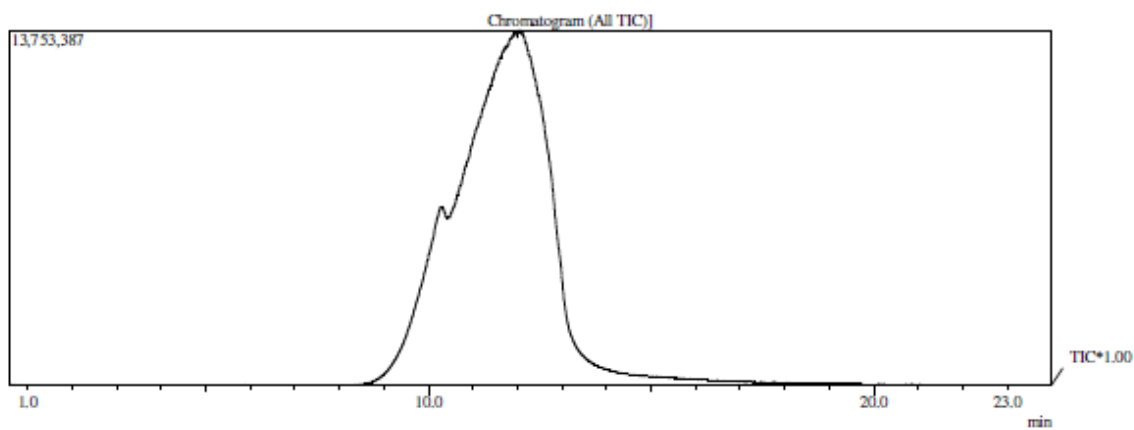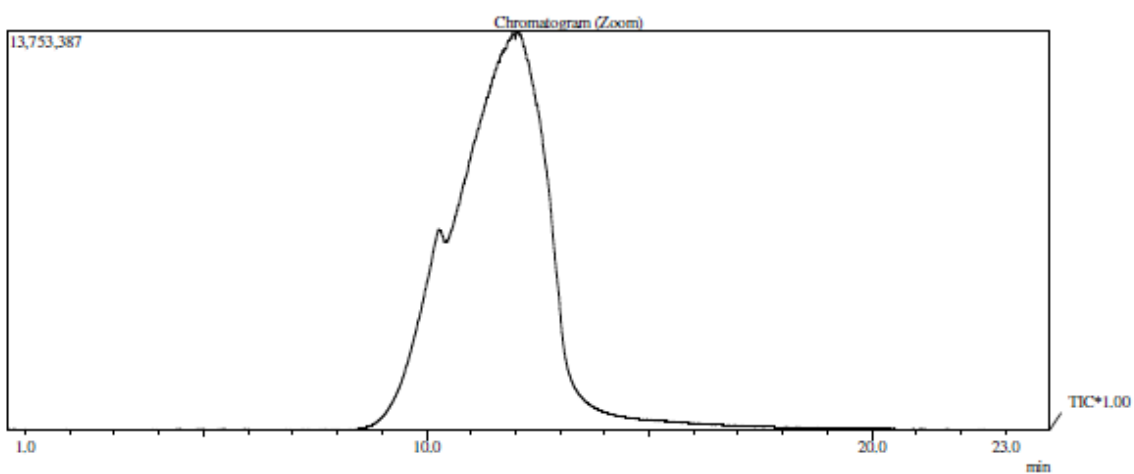

Spectrum

Line#: 1 R.Time: 12.067(Scan#: 1377)

MassPeak: 296

RawMode: Averaged 8.542-16.583(954-1919) BasePeak: 56.05(981801)

BG Mode: None Group 1 - Event 1

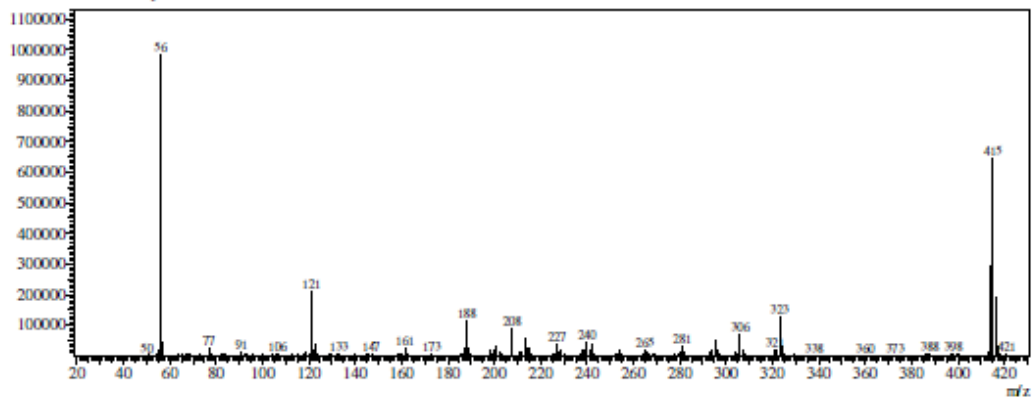

Fig. S4 Mass spectrum of the Probe PYAN (GC-MS)

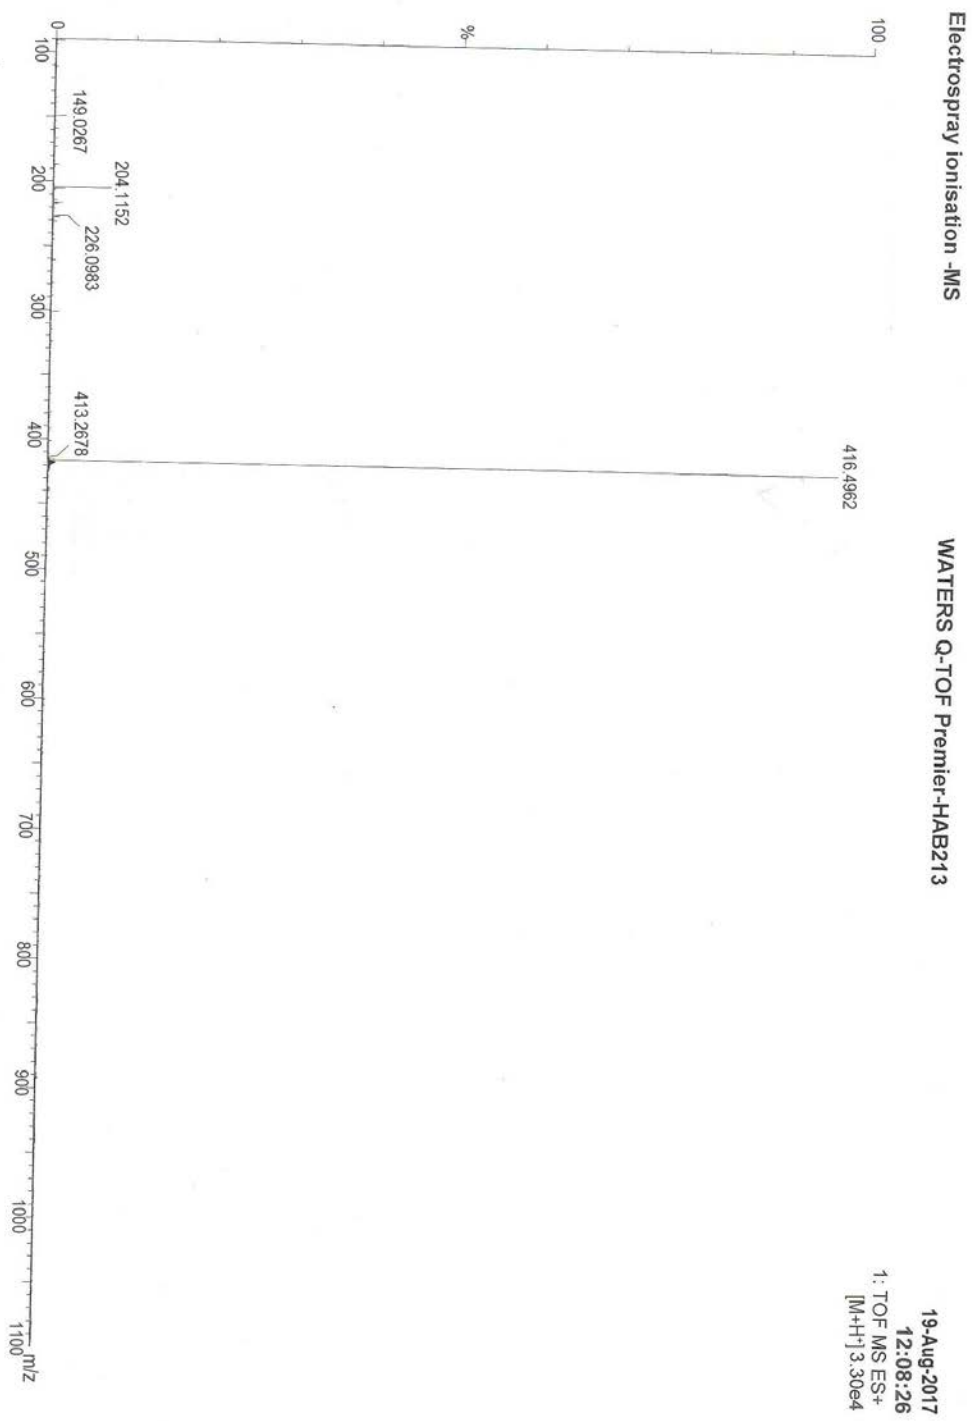

**Fig. S5** Mass spectrum of the Probe PYAN: MS-ESI

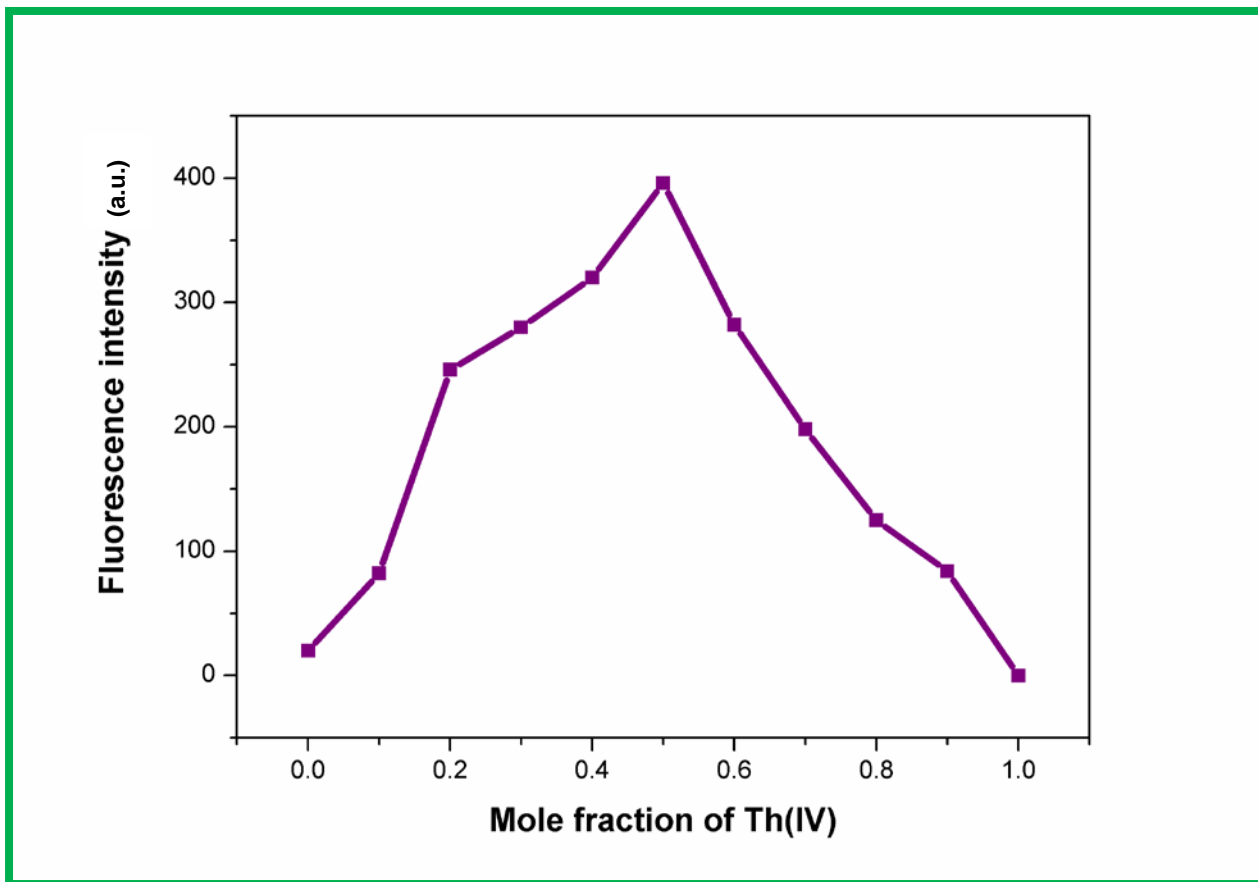

**Fig. S6** Job's plot for emission intensity of PYAN versus mole fraction of Th(IV).

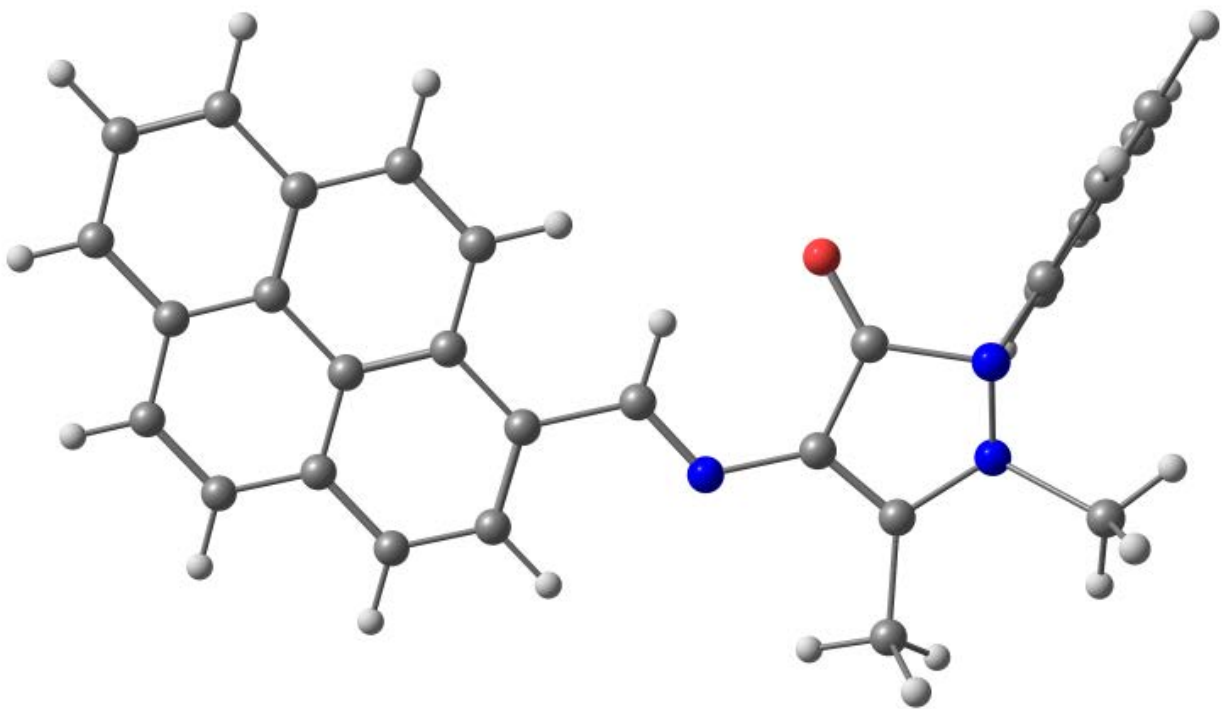

**PYAN**

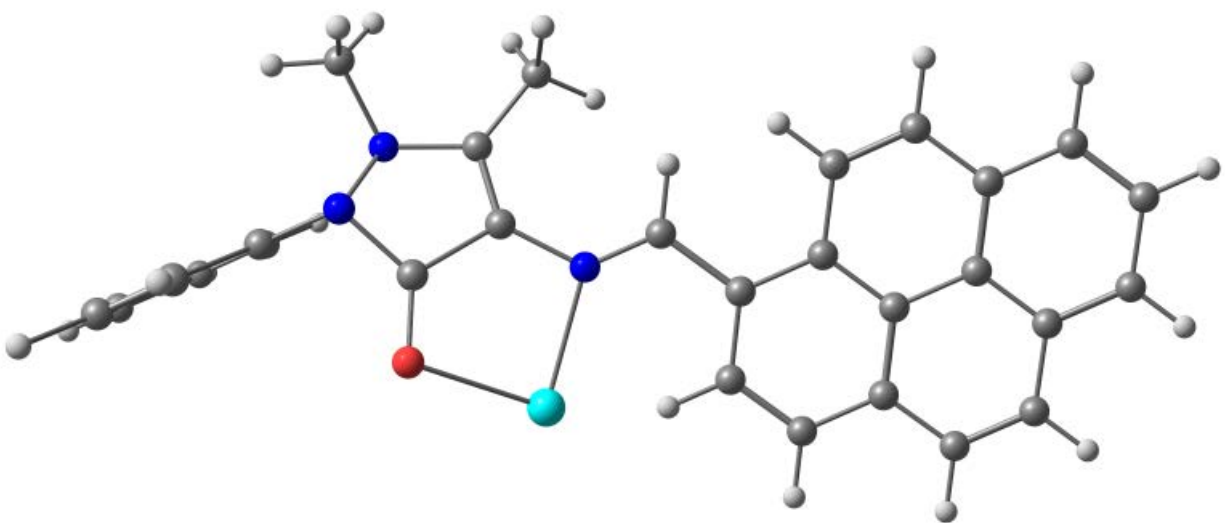

**PYAN+Th(IV)**

**Fig. S7** Optimized structures of PYAN and PYAN-Th(IV) using B3LYP-6-311G, B3LYP-6-311G quasi-relativistic effective core potentials(RECP) respectively.



Probe: PYAN

HOMO-1

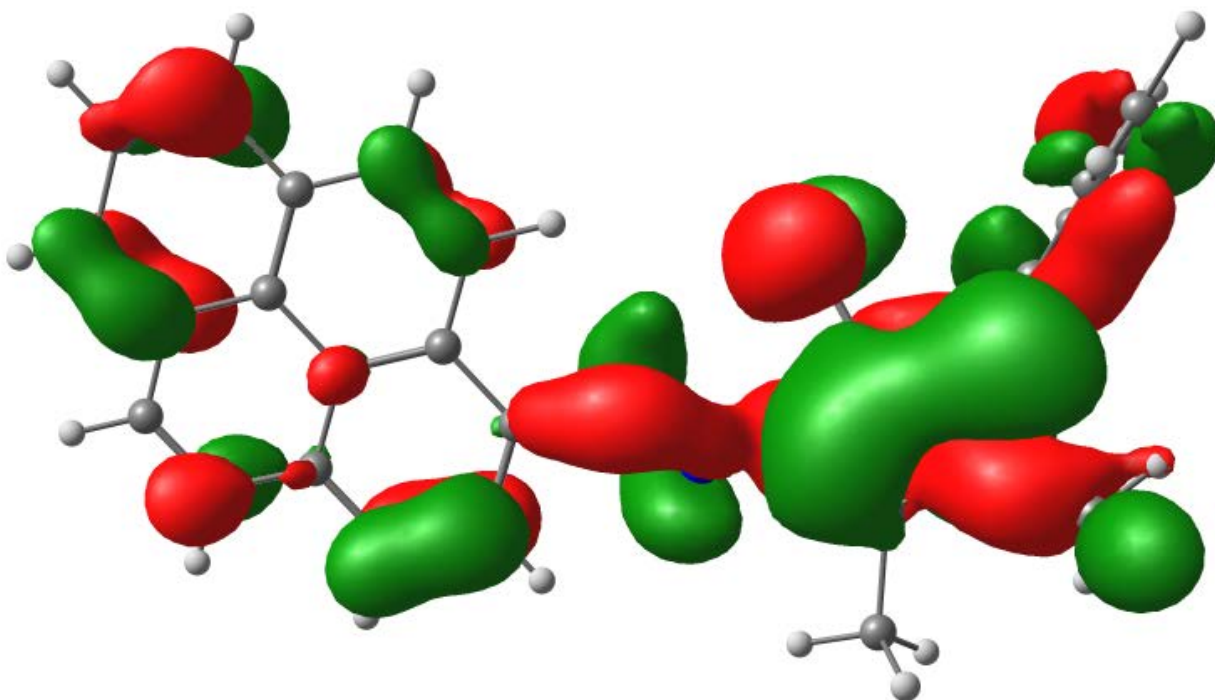

HOMO

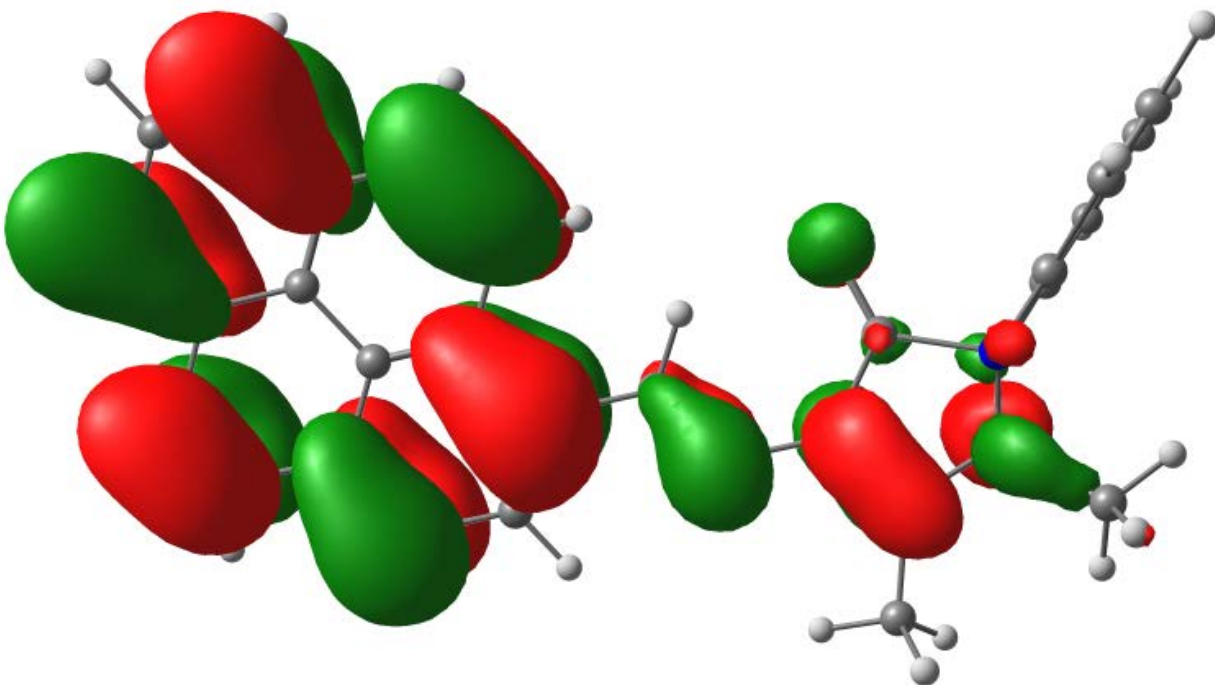

LUMO

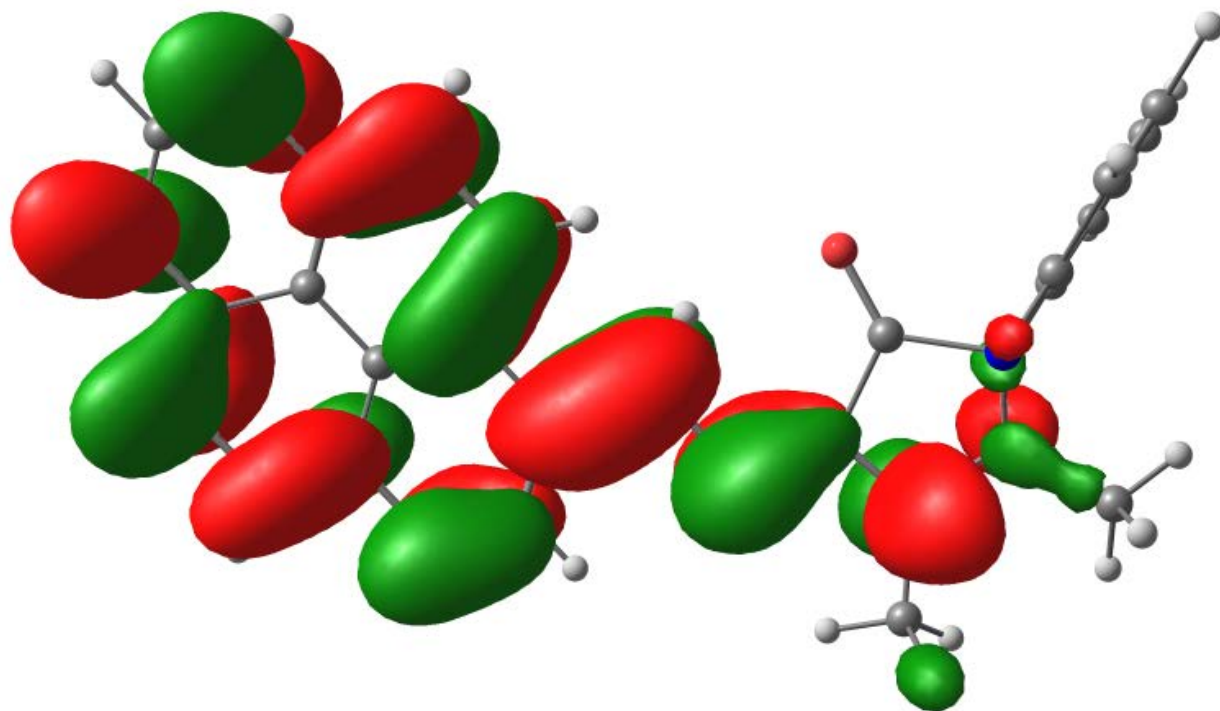

LUMO+1

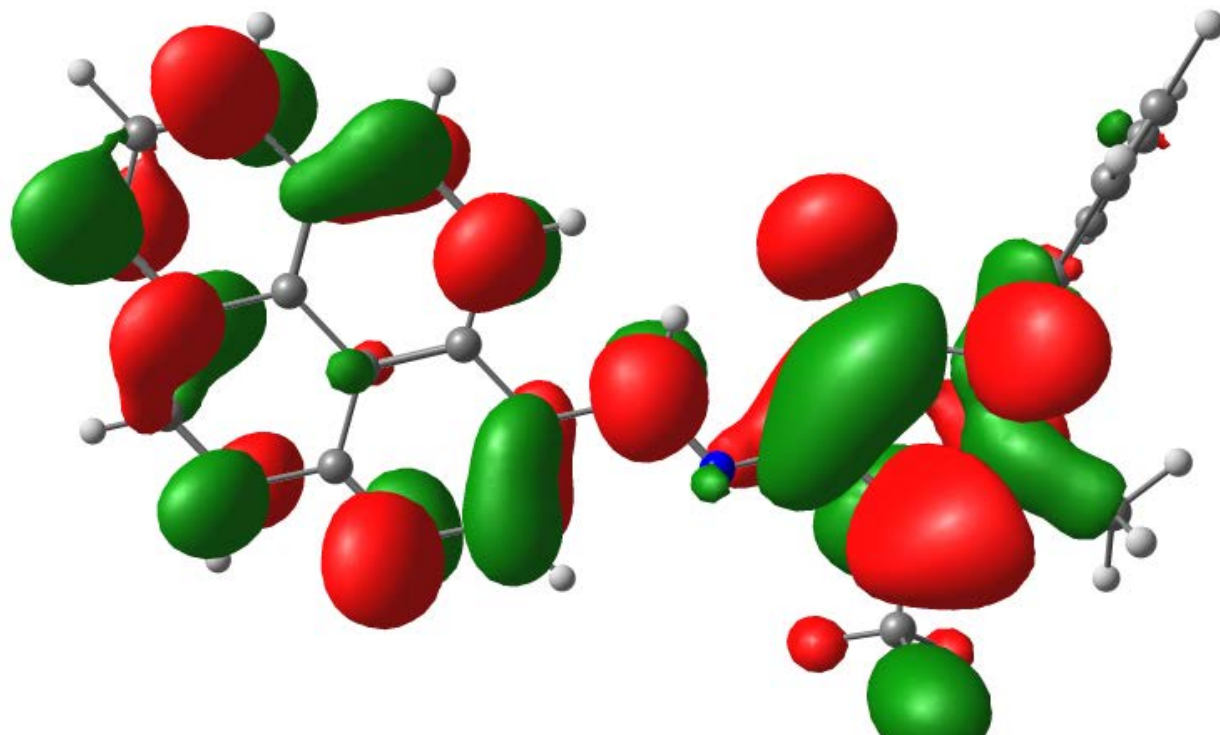

Probe with thorium: PYAN+Th(IV)

HOMO-1

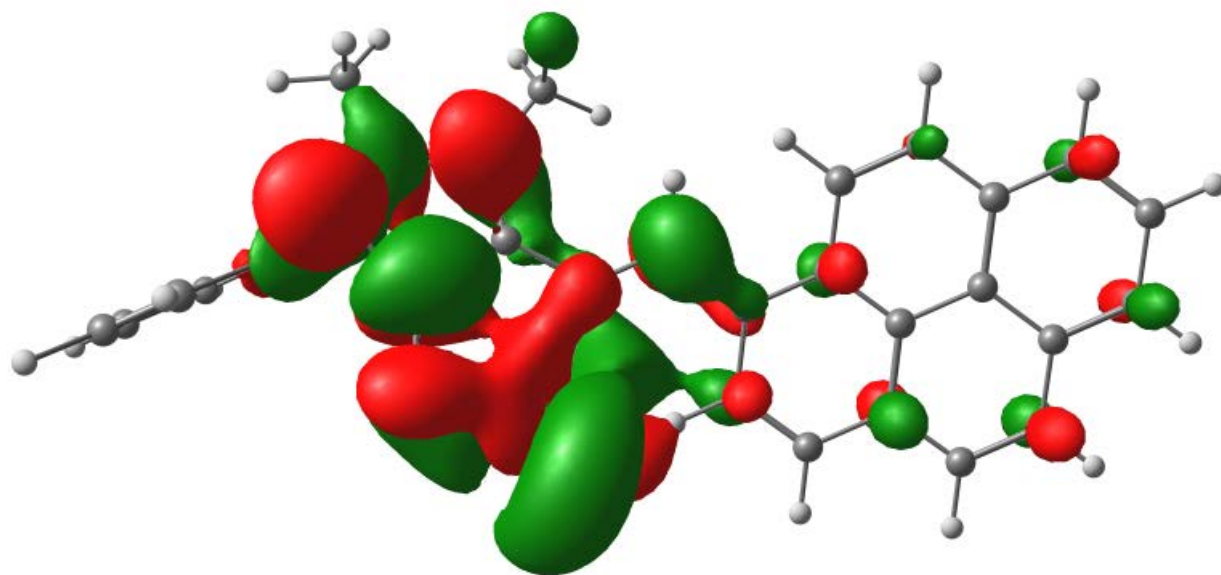

HOMO

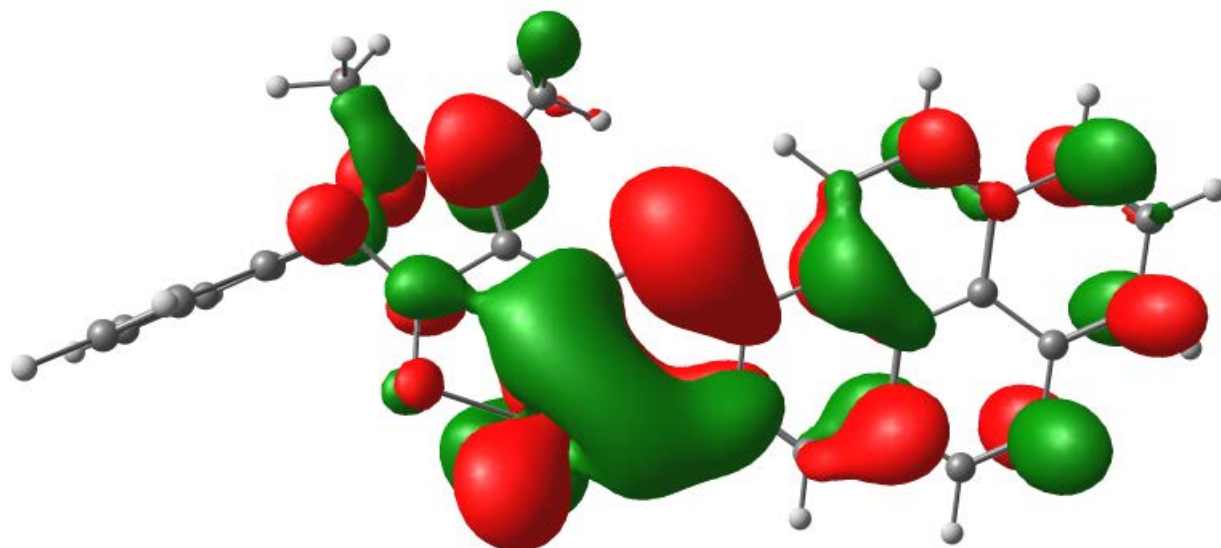

LUMO

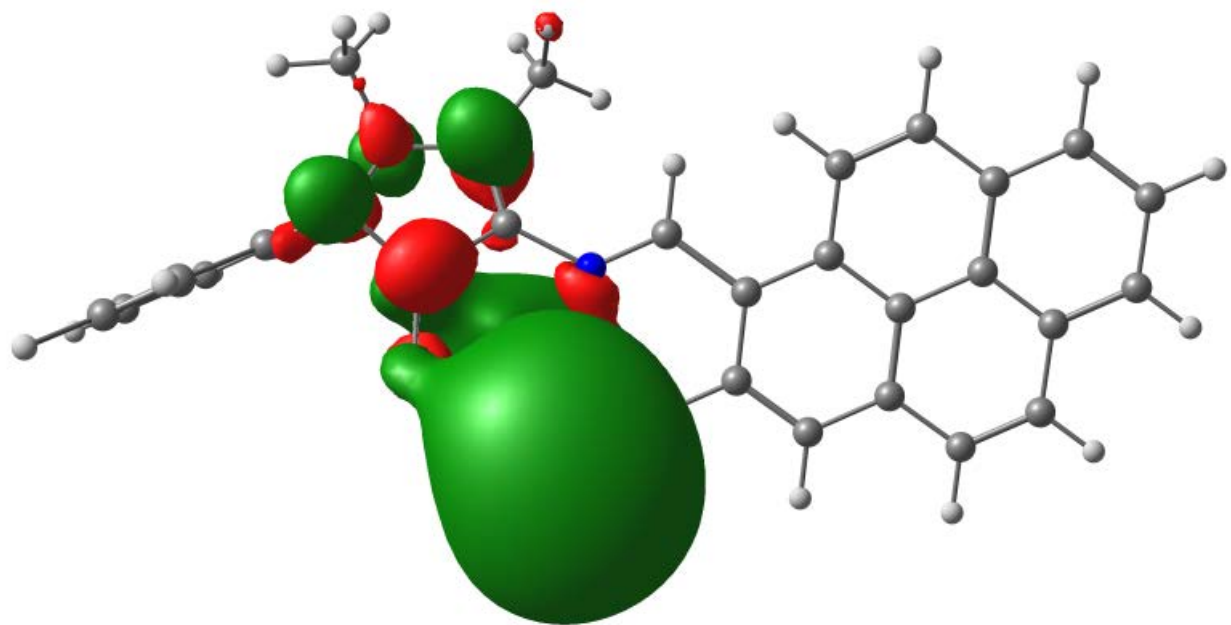

LUMO+1

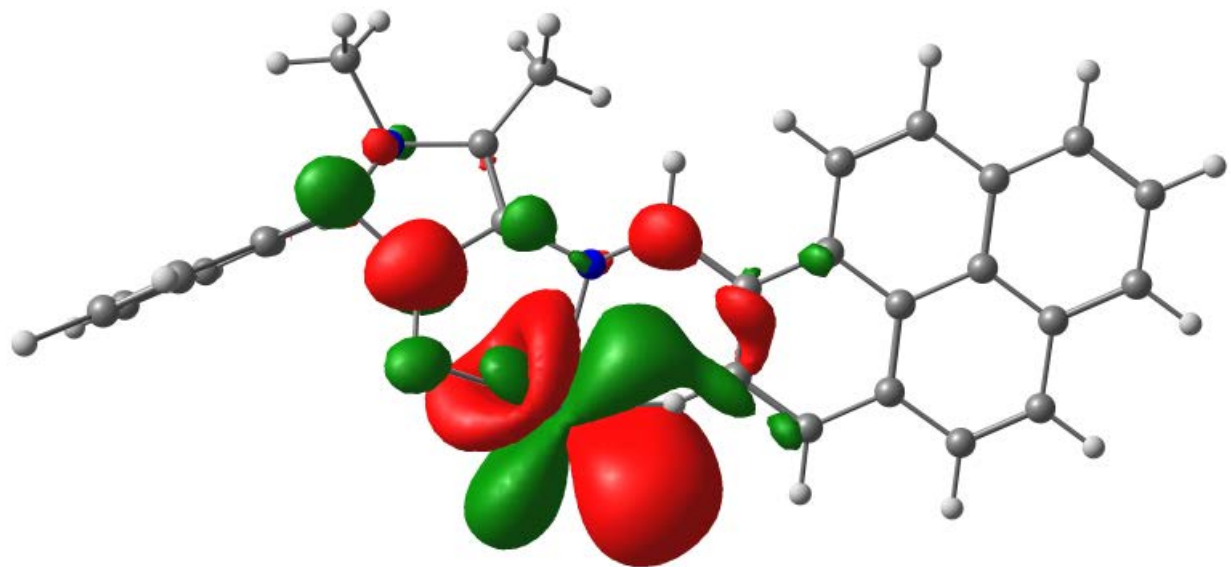

**Fig. S8** Frontier molecular orbitals (FMO's) of PYAN and PYAN + Th(IV) obtained using Gaussian 09 program.

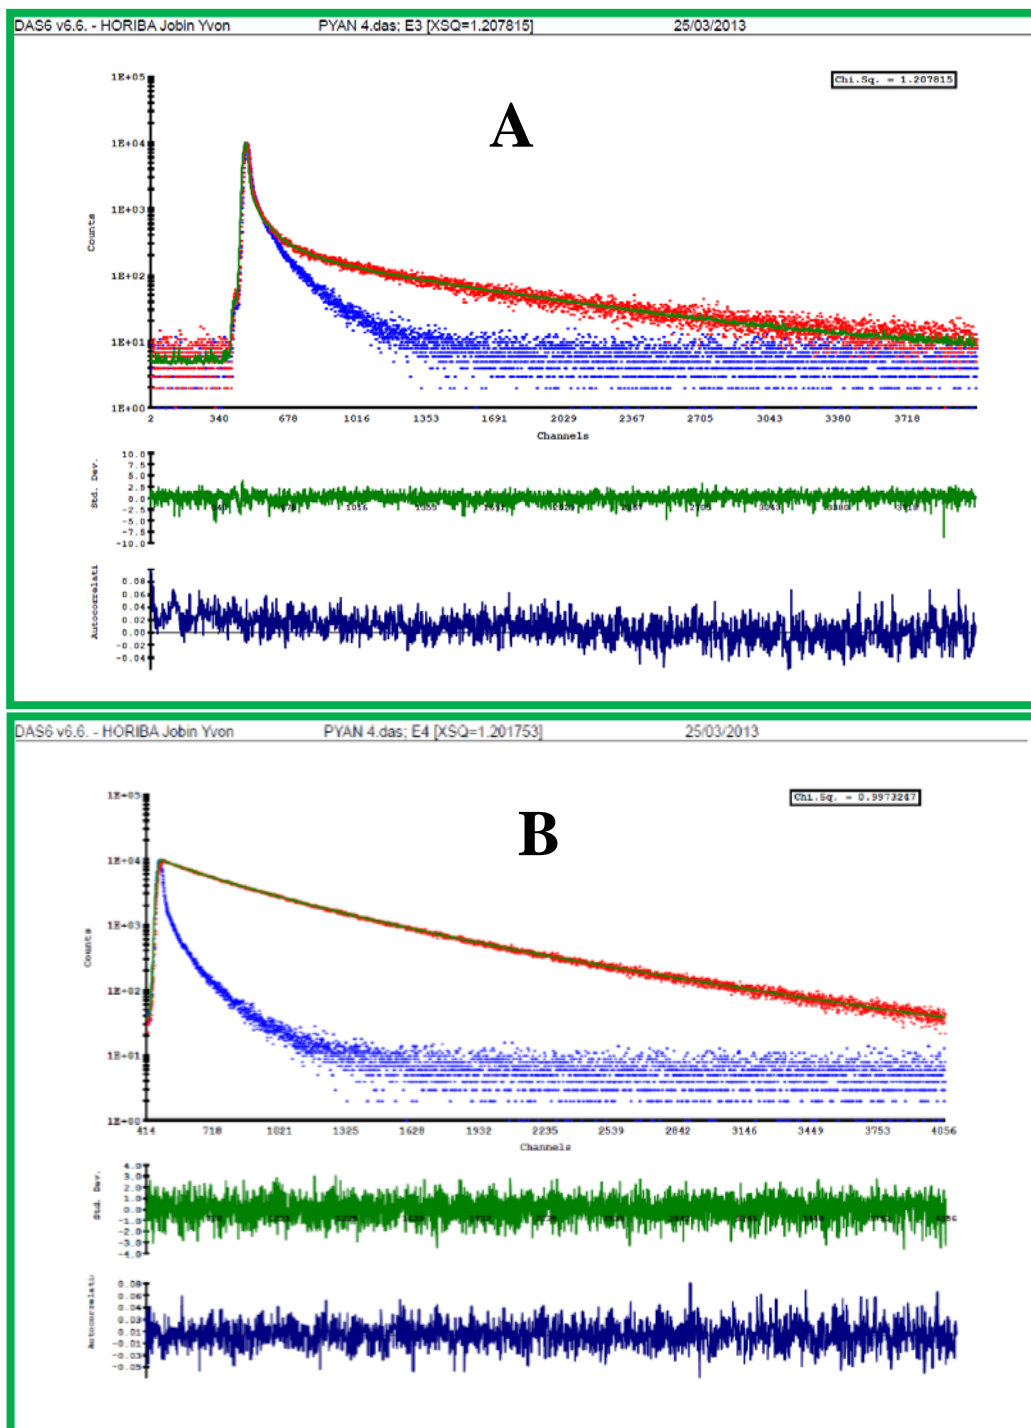

**Fig. S9.** Fluorescence decay profile of PYAN in ACN:H<sub>2</sub>O (1:1, v/v)  $\lambda_{\text{ex}} = 341$  nm;  $\lambda_{\text{em}} = 446$  nm (prompt-blue, decay-red, fit-green) (a) PYAN and (b) PYAN+Th(IV).

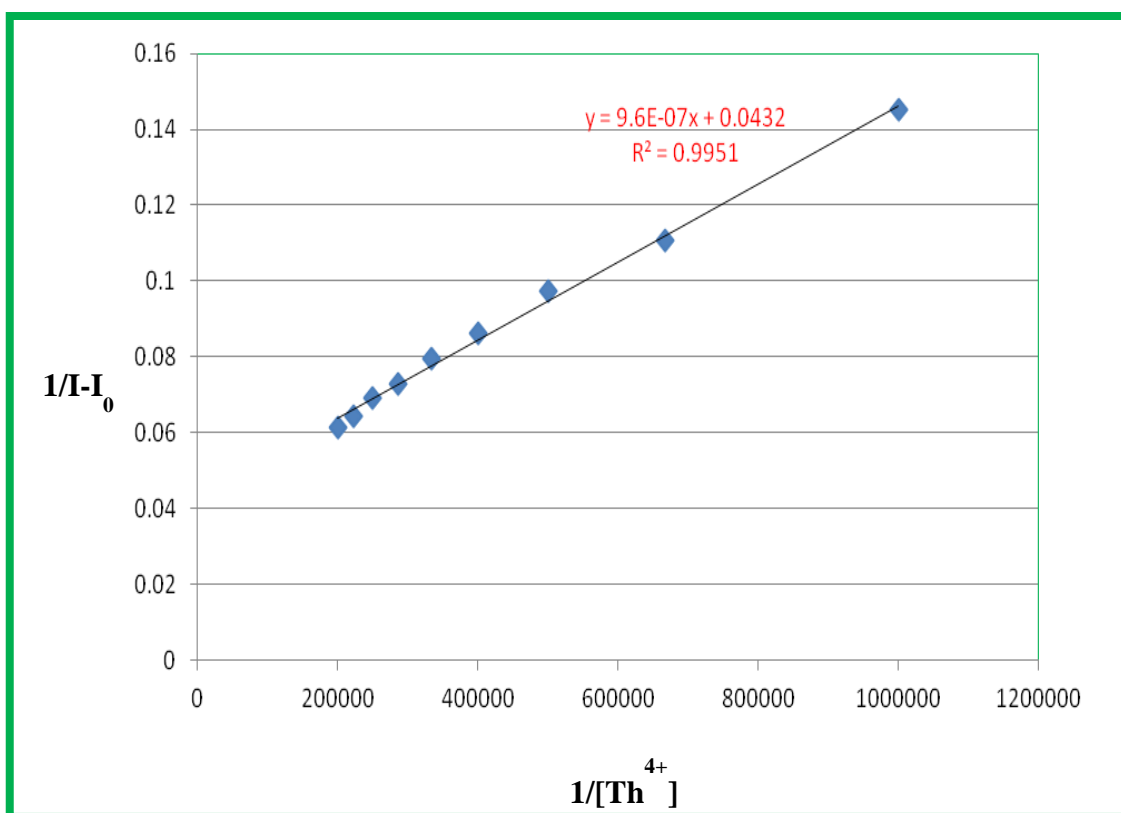

**Fig. S10** Benesi-Hilderbrand plot of PYAN-Th(IV) using 5  $\mu$ M of PYAN.

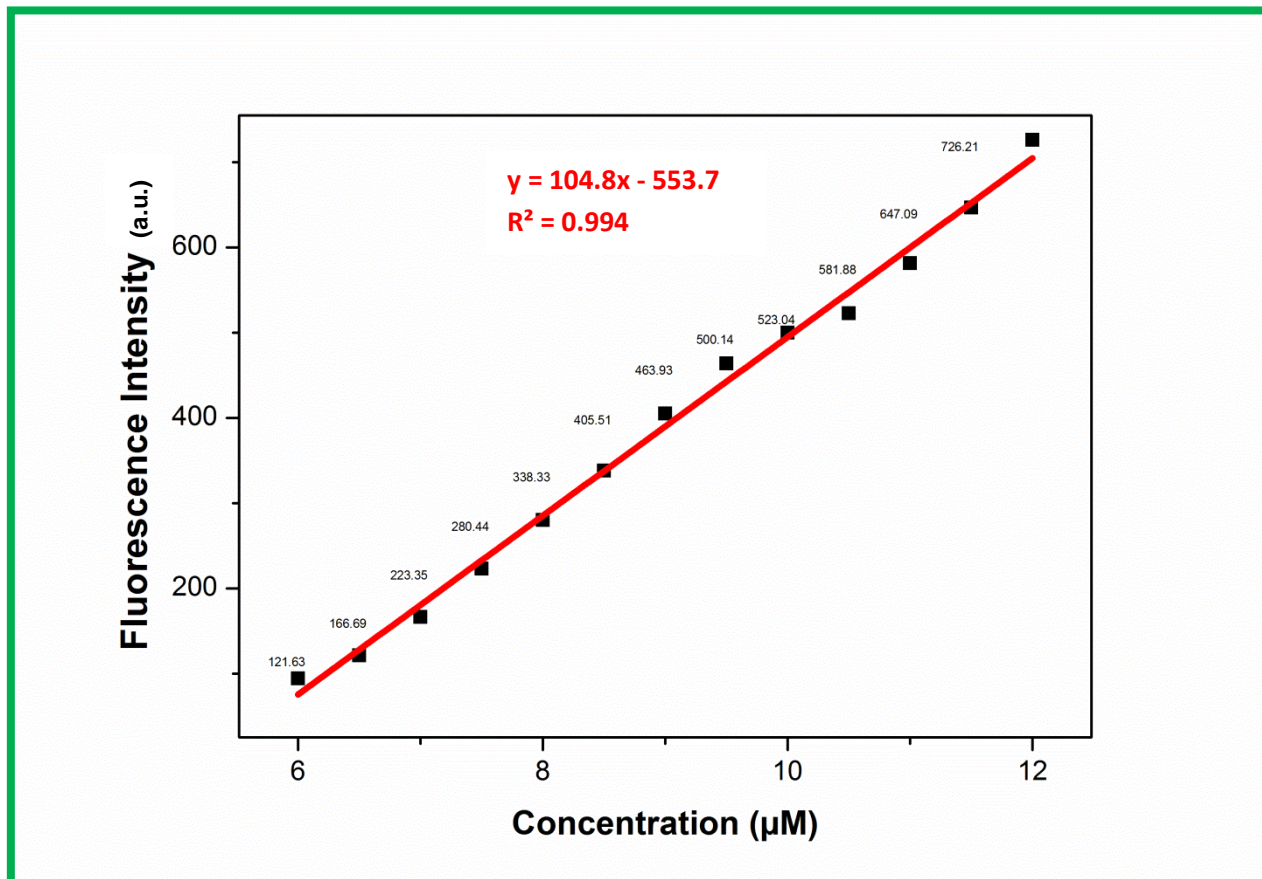

**Fig. S11** Variation in fluorescence intensity with Th(IV) concentration (6 µM to 12 µM).

### III. Table

**Table S1.** Comparison of the present fluorophore with the reported fluorophores for Th(IV) detection.

| Fluorophores                  | Medium                                    | Mechanism | LOD (M)               | Ref          |
|-------------------------------|-------------------------------------------|-----------|-----------------------|--------------|
| BINOL derivative              | MeOH:H <sub>2</sub> O [1:1]               | Turn-OFF  | $6.00 \times 10^{-7}$ | 24(a)        |
| Pillar[5]arene derivative     | CH <sub>3</sub> CN:H <sub>2</sub> O [9:1] | Turn-OFF  | $5.35 \times 10^{-7}$ | 24(b)        |
| Thorin                        | Acidic pH                                 | Turn-ON   | $1.85 \times 10^{-6}$ | 24(c)        |
| Malanohydrazide derivative    | MeOH:H <sub>2</sub> O [1:1]               | Turn-ON   | $0.10 \times 10^{-6}$ | 24(d)        |
| Tetraphenylethenes derivative | MeOH:H <sub>2</sub> O [7:3]               | Turn-ON   | $1.67 \times 10^{-7}$ | 24(e)        |
| Coumarin derivative           | DCM:MeOH [9:1]                            | Turn-ON   | $1.50 \times 10^{-6}$ | 24(f)        |
| Pyrene-Antipyrine Schiff base | CH <sub>3</sub> CN:H <sub>2</sub> O [1:1] | Turn-ON   | $4.90 \times 10^{-9}$ | Present work |
